# Supplementary material for: Life History and Sociality Predict Variation in Eye Size across Birds
Source: MDPI journal article supplement (doi:10.3390/birds4030024), 2023-08-23
Supplement: s1 [file s1]

Table S1. Variance inflation factors for the effect of habitat, diet, foraging substrate, sociality, timing of activity, migration, latitude, foraging, body mass, and life history on eye volume in birds (n = 660 species).

| Factor                  | Level                                         | VIF  |
|-------------------------|-----------------------------------------------|------|
| Habitat                 | Semi-open v. closed                           | 2.70 |
|                         | Open v. closed                                | 2.13 |
| Diet                    | Fruits/nectar v. invertebrates                | 1.18 |
|                         | Omnivore v. invertebrates                     | 1.25 |
|                         | Plants/seeds v. invertebrates                 | 1.43 |
|                         | Vertebrates/carrion v. invertebrates          | 1.93 |
|                         | Aerial v. terrestrial-ground                  | 1.25 |
| Substrate               | Aquatic v. terrestrial-ground                 | 3.17 |
|                         | Terrestrial-canopy v. terrestrial-ground      | 1.15 |
|                         | Terrestrial-mid-story v. terrestrial-ground   | 1.60 |
|                         | Terrestrial-under-story v. terrestrial-ground | 1.58 |
|                         | Occasional v. solitary                        | 1.94 |
| Flocking                | Flocking v. solitary                          | 1.68 |
|                         | Nocturnal-diurnal v. diurnal                  | 4.49 |
| Timing of activity      | Nocturnal v. diurnal                          | 4.91 |
|                         | Absent v. present                             | 1.59 |
| Migration               | Absent v. present                             | 1.59 |
| Foraging                | Myopic v. hyperopic                           | 1.77 |
| Absolute latitude       | -                                             | 1.78 |
| Pace-of-life axis (PC1) | -                                             | 2.43 |
| Body-mass axis (PC2)    | -                                             | 2.55 |

Table S2. Table of 136 families and 660 species with available data on eye size, life history, and flocking. Taxonomy is based on the Cornell Lab of Ornithology Birds of the World. Families are sorted by species sampled.

| Family            | Species worldwide | Species sampled | Proportion sampled |
|-------------------|-------------------|-----------------|--------------------|
| Accipitridae      | 249               | 25              | 0.1                |
| Thamnophilidae    | 237               | 24              | 0.1                |
| Scolopacidae      | 97                | 23              | 0.24               |
| Tyrannidae        | 441               | 23              | 0.05               |
| Procellariidae    | 97                | 20              | 0.21               |
| Corvidae          | 128               | 19              | 0.15               |
| Fringillidae      | 229               | 19              | 0.08               |
| Parulidae         | 115               | 19              | 0.17               |
| Laridae           | 99                | 16              | 0.16               |
| Estrildidae       | 138               | 13              | 0.09               |
| Muscicapidae      | 345               | 13              | 0.04               |
| Thraupidae        | 382               | 13              | 0.03               |
| Alcidae           | 25                | 12              | 0.48               |
| Picidae           | 233               | 12              | 0.05               |
| Anatidae          | 174               | 11              | 0.06               |
| Furnariidae       | 307               | 11              | 0.04               |
| Strigidae         | 228               | 11              | 0.05               |
| Troglodytidae     | 86                | 11              | 0.13               |
| Alcedinidae       | 93                | 10              | 0.11               |
| Passerellidae     | 132               | 10              | 0.08               |
| Nectariniidae     | 143               | 9               | 0.06               |
| Phasianidae       | 186               | 9               | 0.05               |
| Turdidae          | 175               | 9               | 0.05               |
| Cardinalidae      | 49                | 8               | 0.16               |
| Hirundinidae      | 86                | 8               | 0.09               |
| Paridae           | 63                | 8               | 0.13               |
| Pipridae          | 55                | 8               | 0.15               |
| Charadriidae      | 68                | 7               | 0.1                |
| Diomedidae        | 15                | 7               | 0.47               |
| Meliphagidae      | 189               | 7               | 0.04               |
| Rallidae          | 159               | 7               | 0.04               |
| Spheniscidae      | 18                | 7               | 0.39               |
| Trochilidae       | 363               | 7               | 0.02               |
| Icteridae         | 106               | 6               | 0.06               |
| Laniidae          | 34                | 6               | 0.18               |
| Ploceidae         | 123               | 6               | 0.05               |
| Pycnonotidae      | 151               | 6               | 0.04               |
| Threskiornithidae | 36                | 6               | 0.17               |
| Vireonidae        | 61                | 6               | 0.1                |
| Ardeidae          | 68                | 5               | 0.07               |

|                   |     |   |      |
|-------------------|-----|---|------|
| Climacteridae     | 7   | 5 | 0.71 |
| Columbidae        | 353 | 5 | 0.01 |
| Sittidae          | 28  | 5 | 0.18 |
| Timaliidae        | 58  | 5 | 0.09 |
| Apodidae          | 103 | 4 | 0.04 |
| Cisticolidae      | 162 | 4 | 0.02 |
| Maluridae         | 32  | 4 | 0.13 |
| Mimidae           | 34  | 4 | 0.12 |
| Motacillidae      | 69  | 4 | 0.06 |
| Passeridae        | 43  | 4 | 0.09 |
| Petroicidae       | 49  | 4 | 0.08 |
| Phalacrocoracidae | 40  | 4 | 0.1  |
| Psittacidae       | 175 | 4 | 0.02 |
| Rhipiduridae      | 54  | 4 | 0.07 |
| Stercorariidae    | 7   | 4 | 0.57 |
| Sulidae           | 10  | 4 | 0.4  |
| Acrocephalidae    | 59  | 3 | 0.05 |
| Alaudidae         | 91  | 3 | 0.03 |
| Caprimulgidae     | 96  | 3 | 0.03 |
| Cathartidae       | 7   | 3 | 0.43 |
| Ciconiidae        | 20  | 3 | 0.15 |
| Cinclidae         | 5   | 3 | 0.6  |
| Coliidae          | 6   | 3 | 0.5  |
| Hydrobatidae      | 18  | 3 | 0.17 |
| Malaconotidae     | 50  | 3 | 0.06 |
| Monarchidae       | 100 | 3 | 0.03 |
| Pachycephalidae   | 63  | 3 | 0.05 |
| Pelecanidae       | 8   | 3 | 0.38 |
| Phaethontidae     | 3   | 3 | 1    |
| Phylloscopidae    | 80  | 3 | 0.04 |
| Ptilonorhynchidae | 27  | 3 | 0.11 |
| Remizidae         | 11  | 3 | 0.27 |
| Sylviidae         | 69  | 3 | 0.04 |
| Zosteropidae      | 143 | 3 | 0.02 |
| Acanthizidae      | 65  | 2 | 0.03 |
| Apterygidae       | 4   | 2 | 0.5  |
| Artamidae         | 11  | 2 | 0.18 |
| Conopophagidae    | 12  | 2 | 0.17 |
| Corcoracidae      | 2   | 2 | 1    |
| Cuculidae         | 147 | 2 | 0.01 |
| Dicruridae        | 29  | 2 | 0.07 |
| Formicariidae     | 12  | 2 | 0.17 |
| Gaviidae          | 5   | 2 | 0.4  |
| Gruidae           | 15  | 2 | 0.13 |
| Haematopodidae    | 12  | 2 | 0.17 |
| Macrosphenidae    | 21  | 2 | 0.1  |
| Odontophoridae    | 33  | 2 | 0.06 |

|                  |     |   |      |
|------------------|-----|---|------|
| Otididae         | 26  | 2 | 0.08 |
| Pellorneidae     | 62  | 2 | 0.03 |
| Platysteiridae   | 32  | 2 | 0.06 |
| Prunellidae      | 12  | 2 | 0.17 |
| Vangidae         | 40  | 2 | 0.05 |
| Viduidae         | 20  | 2 | 0.1  |
| Acanthisittidae  | 2   | 1 | 0.5  |
| Aegithalidae     | 10  | 1 | 0.1  |
| Bucconidae       | 35  | 1 | 0.03 |
| Burhinidae       | 10  | 1 | 0.1  |
| Cacatuidae       | 21  | 1 | 0.05 |
| Callaeidae       | 5   | 1 | 0.2  |
| Casuariidae      | 4   | 1 | 0.25 |
| Certhiidae       | 11  | 1 | 0.09 |
| Chionidae        | 2   | 1 | 0.5  |
| Coraciidae       | 13  | 1 | 0.08 |
| Cotingidae       | 65  | 1 | 0.02 |
| Diodemeidae      | 15  | 1 | 0.07 |
| Dromadidae       | 1   | 1 | 1    |
| Emberizidae      | 45  | 1 | 0.02 |
| Eurylaimidae     | 9   | 1 | 0.11 |
| Fregatidae       | 5   | 1 | 0.2  |
| Galbulidae       | 18  | 1 | 0.06 |
| Icteriidae       | 1   | 1 | 1    |
| Meropidae        | 31  | 1 | 0.03 |
| Oceanitidae      | 10  | 1 | 0.1  |
| Opisthocomidae   | 1   | 1 | 1    |
| Oxyruncidae      | 7   | 1 | 0.14 |
| Pandionidae      | 1   | 1 | 1    |
| Panuridae        | 1   | 1 | 1    |
| Phoenicopteridae | 6   | 1 | 0.17 |
| Phoeniculidae    | 8   | 1 | 0.13 |
| Podicipedidae    | 22  | 1 | 0.05 |
| Poliophtidae     | 21  | 1 | 0.05 |
| Pomatostomidae   | 5   | 1 | 0.2  |
| Psophiidae       | 3   | 1 | 0.33 |
| Psophodidae      | 5   | 1 | 0.2  |
| Recurvirostridae | 9   | 1 | 0.11 |
| Regulidae        | 6   | 1 | 0.17 |
| Rhinocryptidae   | 65  | 1 | 0.02 |
| Rostratulidae    | 3   | 1 | 0.33 |
| Scotocercidae    | 35  | 1 | 0.03 |
| Strigopidae      | 4   | 1 | 0.25 |
| Sturnidae        | 125 | 1 | 0.01 |
| Tityridae        | 33  | 1 | 0.03 |
| Todidae          | 5   | 1 | 0.2  |
| Trogonidae       | 43  | 1 | 0.02 |

|           |    |   |      |
|-----------|----|---|------|
| Tytonidae | 18 | 1 | 0.06 |
| Upupidae  | 1  | 1 | 1    |

---

The top five families accounted for 17% of the data. The median proportion of species sampled per family was 0.1.

Table S3. Results from a phylogenetic linear model for the effect of habitat, diet, foraging substrate, sociality, timing of activity, migration, latitude, foraging, body mass, and life history on axial length in birds (n = 660 species).

| Factor                     | Level                                         | Estimate (SEM)      | p-value |
|----------------------------|-----------------------------------------------|---------------------|---------|
| Intercept                  | -                                             | 1.12 (0.072)        | <0.0001 |
| Habitat                    | Semi-open v. closed                           | -0.011 (0.0053)     | 0.044   |
|                            | Open v. closed                                | -0.026 (0.0068)     | <0.0001 |
| Diet                       | Fruits/nectar v. invertebrates                | -0.012 (0.011)      | 0.24    |
|                            | Omnivore v. invertebrates                     | -0.0015 (0.0061)    | 0.81    |
|                            | Plants/seeds v. invertebrates                 | -0.0000051 (0.0099) | 0.99    |
|                            | Vertebrates/carrion v. invertebrates          | -0.0091 (0.0086)    | 0.29    |
| Substrate                  | Aerial v. terrestrial-ground                  | 0.089 (0.026)       | 0.0006  |
|                            | Aquatic v. terrestrial-ground                 | -0.035 (0.011)      | 0.0009  |
|                            | Terrestrial-canopy v. terrestrial-ground      | -0.019 (0.0095)     | 0.049   |
|                            | Terrestrial-mid-story v. terrestrial-ground   | -0.012 (0.0067)     | 0.073   |
|                            | Terrestrial-under-story v. terrestrial-ground | -0.0041 (0.0061)    | 0.50    |
| Flocking                   | Occasional v. solitary                        | -0.0064 (0.0056)    | 0.25    |
|                            | Flocking v. solitary                          | -0.018 (0.0058)     | 0.002   |
| Timing of activity         | Nocturnal-diurnal v. diurnal                  | -0.0031 (0.009)     | 0.73    |
|                            | Nocturnal v. diurnal                          | -0.0038 (0.014)     | 0.78    |
| Migration                  | Absent v. present                             | 0.0042 (0.0051)     | 0.41    |
| Foraging                   | Myopic v. hyperopic                           | -0.027 (0.008)      | 0.0007  |
| Absolute latitude          | -                                             | -0.00025 (0.00014)  | 0.08    |
| Pace-of-life axis<br>(PC1) | -                                             | -0.38 (0.023)       | <0.0001 |
| Body-mass axis<br>(PC2)    | -                                             | 0.78 (0.025)        | <0.0001 |
